# Supplementary material for: Selective Capture and Purification of MicroRNAs and Intracellular Proteins through Antisense-vectorized Magnetic Nanobeads
Source: PubMed Central journal article supplement (PMC6375918; doi:10.1038/s41598-019-39575-7), 2019-02-14
Supplement: 41598_2019_39575_MOESM1_ESM.pdf [file 41598_2019_39575_MOESM1_ESM.pdf]

# Supporting information

## Selective Capture and Purification of MicroRNAs and Intracellular Proteins through Antisense-vectorized Magnetic Nanobeads

Isabel Gessner<sup>1</sup>, Xiaojie Yu<sup>2,3</sup>, Christian Jüngst<sup>4</sup>, Annika Klimpel<sup>5</sup>, Lingyu Wang<sup>2,3</sup>, Thomas Fischer<sup>1</sup>, Ines Neundorff<sup>5</sup>, Astrid Schauss<sup>4</sup>, Margarete Odenthal<sup>2,3,6</sup>, Sanjay Mathur<sup>1,\*</sup>

<sup>1</sup> Institute of Inorganic Chemistry, University of Cologne, Greinstr. 6, 50939 Cologne, Germany

<sup>2</sup> Institute for Pathology, University Hospital of Cologne, Kerpener Str. 62, 50924 Cologne, Germany

<sup>3</sup> Center for Molecular Medicine (CMMC), University of Cologne, Robert-Koch-Straße 21, 50931 Cologne, Germany

<sup>4</sup> Cluster of Excellence - Cellular Stress Responses in Aging-Associated Diseases (CECAD), Imaging Facility, University of Cologne, Joseph-Stelzmann-Str. 26, 50931 Cologne, Germany

<sup>5</sup> Institute of Biochemistry, University of Cologne, Zulpicher Str. 47, 50674 Cologne, Germany

<sup>6</sup> Center of Integrative Oncology, University Clinic of Cologne and Bonn, Germany

\*corresponding author: [sanjay.mathur@uni-koeln.de](mailto:sanjay.mathur@uni-koeln.de)

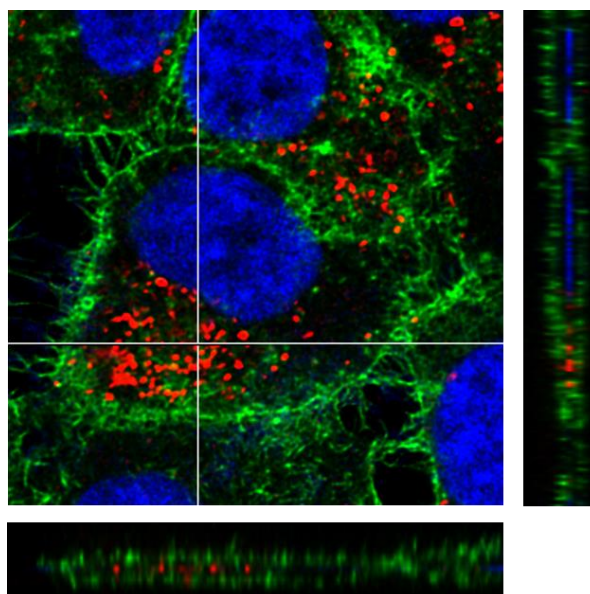

Figure S 1: Orthogonal view of confocal microscopic stackings performed for scramble functionalized magnetic beads in Huh7 cells.

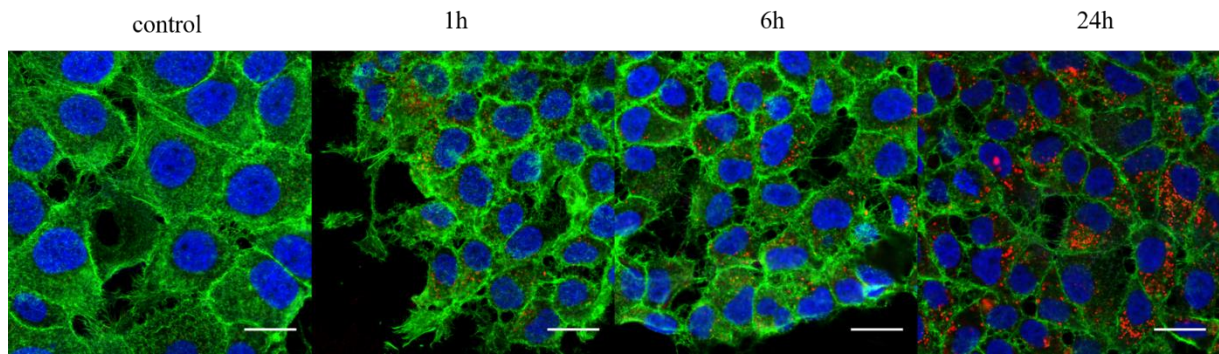

*Figure S 2: Confocal microscopic images of Huh7 cells incubated with scramble functionalized magnetic beads for incubation times between 0-24 hours. The cytoskeleton was stained with phalloidin green, while the nucleus was stained with DAPI. The scale bar in all images refers to 25  $\mu$ m.*
